# Supplementary material for: Color tunable up-conversion emission from ZrO2:Er3+,Yb3+ textile fibers
Source: Royal Society of Chemistry journal article supplement (doi:10.1039/c6ra20388d), 2016-01-01
Supplement: c6ra20388d1.pdf [file c6ra20388d1.pdf]

## Supporting Information

### Color Tunable Up-conversion Emission from $\text{ZrO}_2$ : $\text{Er}^{3+}$ , $\text{Yb}^{3+}$ Textile Fibers

Xingshuang Zhang, Dong Xu\*, Guangjun Zhou\*, Xinqiang Wang, Hongjing Liu,  
Zhichao Yu, Guanghui Zhang, Luyi Zhu

State Key Laboratory of Crystal Materials, Shandong University, Jinan 250100, P. R.  
China.

\* Corresponding author. Fax: +86 531 88364233

E-mail address: xdoffice@sdu.edu.cn (D. Xu); gjzhou@sdu.edu.cn (G. Zhou)

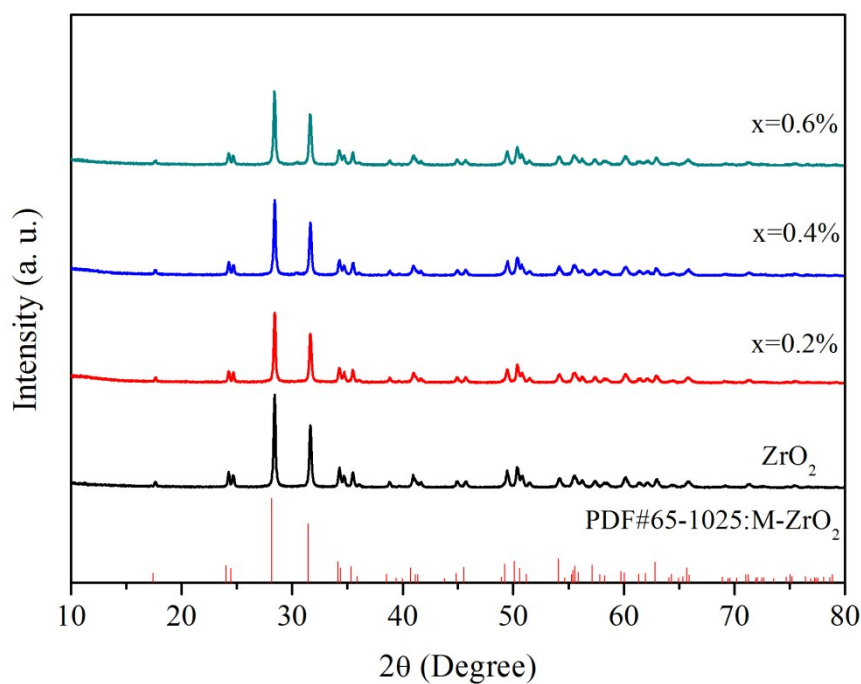

**Figure S1** XRD patterns of 0 mol%  $\text{Er}^{3+}$  and  $x$  ( $x=0.2-0.6$  mol%)  $\text{Er}^{3+}$  ions-doped  $\text{ZrO}_2$  nanofibers annealed at 1000 °C for 1h and the standard card of monoclinic zirconia (PDF#65-1025).

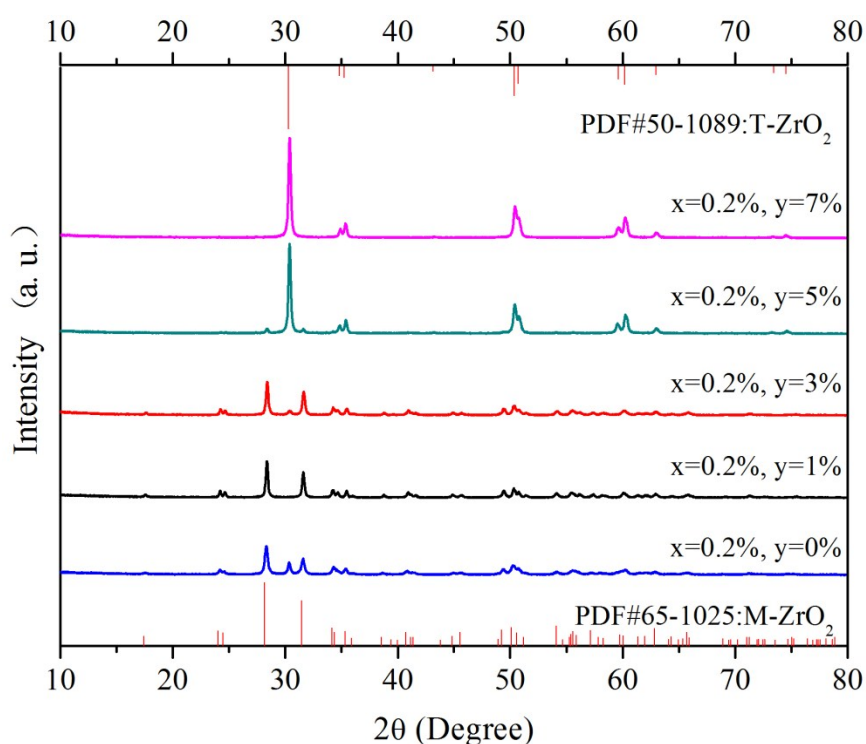

**Figure S2** XRD patterns of 0.2 mol%  $\text{Er}^{3+}$ ,  $y$  ( $y=0-7$  mol %)  $\text{Yb}$  ions-doped  $\text{ZrO}_2$  nanofibers annealed at 1000 °C for 1h and the standard cards of monoclinic zirconia (PDF#65-1025) and tetragonal zirconia (PDF#50-1089).

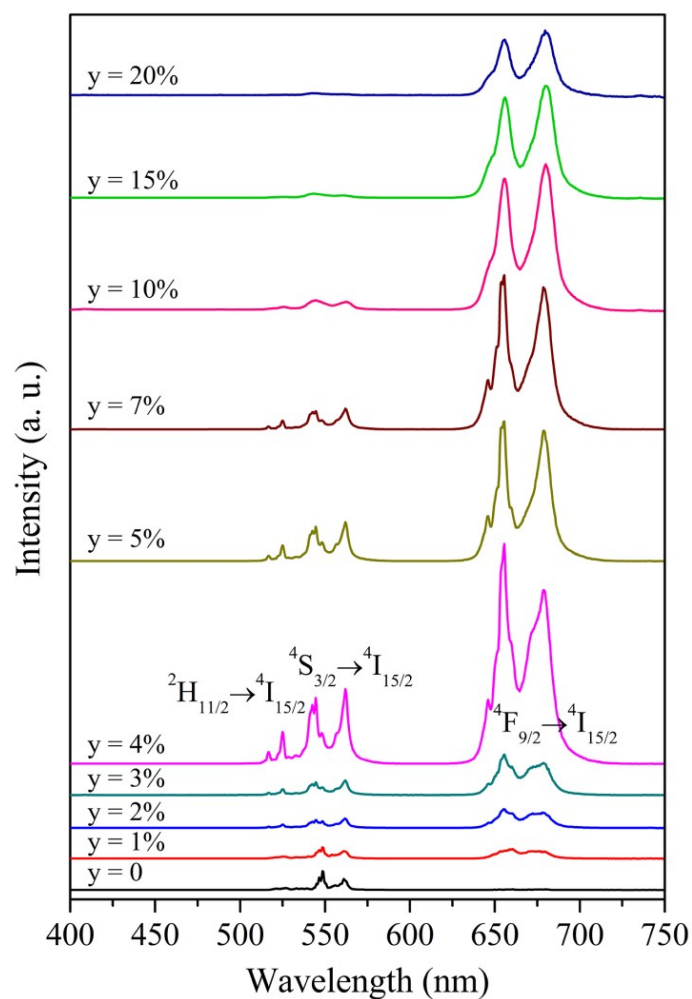

**Figure S3** Emission spectra of 0.2 mol% Er<sup>3+</sup> and y Yb<sup>3+</sup> co-doped ZrO<sub>2</sub> samples prepared with a function of doped concentrations ( $\lambda_{\text{ex}}=980$  nm).

**Table 1** CIE 1931 coordinates for 0.2 mol%Er<sup>3+</sup>, y Yb<sup>3+</sup> at 980 nm excitation wavelength as indicated.

| $\lambda_{\text{ex}}=980$ nm | Er <sup>3+</sup> (x mol%) | Yb <sup>3+</sup> (y mol%) | X      | Y      |
|------------------------------|---------------------------|---------------------------|--------|--------|
|                              | 0.2                       | 0                         | 0.3154 | 0.6747 |
|                              | 0.2                       | 1                         | 0.3738 | 0.6158 |
|                              | 0.2                       | 2                         | 0.4145 | 0.5759 |
|                              | 0.2                       | 3                         | 0.4386 | 0.5513 |
|                              | 0.2                       | 4                         | 0.4430 | 0.5476 |
|                              | 0.2                       | 5                         | 0.4564 | 0.5350 |
|                              | 0.2                       | 7                         | 0.5306 | 0.4622 |
|                              | 0.2                       | 10                        | 0.5613 | 0.4312 |
|                              | 0.2                       | 15                        | 0.6140 | 0.3808 |
|                              | 0.2                       | 20                        | 0.6821 | 0.3146 |

**Table 2** Lifetime of  ${}^2H_{11/2}/{}^4S_{3/2} \rightarrow {}^4I_{15/2}$  and  ${}^4F_{9/2} \rightarrow {}^4I_{15/2}$  transitions in  $ZrO_2: Er^{3+}, Yb^{3+}$  fibers under 980 nm excitation.

| $\lambda$ | 545 nm        |                     |                     |          | 680 nm        |                     |                     |          |
|-----------|---------------|---------------------|---------------------|----------|---------------|---------------------|---------------------|----------|
| y         | $\tau(\mu s)$ | $\tau_1(\mu s)$ (%) | $\tau_2(\mu s)$ (%) | $\chi^2$ | $\tau(\mu s)$ | $\tau_1(\mu s)$ (%) | $\tau_2(\mu s)$ (%) | $\chi^2$ |
| 0 %       | 39.90         | 31.17 (92.21)       | 143.23 (7.79)       | 1.321    | 40.91         | 30.12 (90.7)        | 146.17 (9.3)        | 0.880    |
| 5 %       | 350.9         | 110.9 (19.64)       | 409.5 (80.36)       | 1.183    | 533.6         | 214.9 (30.86)       | 674.1 (69.32)       | 0.999    |
| 10 %      | 200.8         | 105.1 (57.75)       | 331.5 (42.25)       | 1.198    | 207.5         | 106.4 (59.37)       | 355.2 (40.63)       | 1.000    |
| 15 %      | 68.87         | 48.52 (61.08)       | 100.8 (38.92)       | 1.142    | 80.36         | 50.3 (62.38)        | 130.2 (37.62)       | 0.782    |
| 20 %      | 108.2         | 49.36 (57.71)       | 188.5 (42.29)       | 1.107    | 92.70         | 44.5 (64.16)        | 179.0 (35.84)       | 1.000    |
